# Supplementary material for: Cell wall biogenesis of Arabidopsis thaliana elongating cells: transcriptomics complements proteomics
Source: PubMed Central journal article supplement (PMC2774874; doi:10.1186/1471-2164-10-505), 2009-10-31
Supplement: 1471-2164-10-505-S2.pdf [file 1471-2164-10-505-S2.pdf]

**Additional file 2. Cell Wall Genes (CWGs) with high levels of transcripts in either 5- or 11-day-old hypocotyls.**

CWGs were selected according to several papers and databases as mentioned in Methods. The intensity of the signal is expressed as  $\log_2$ . The  $\log_2$  of ratios between the levels of transcripts at 11-days and 5-days as well as the Bonferroni p-values are indicated. CWGs are classified family wise.

| Functional classes                       | AGI number | Predicted or known gene function                                          | 5-days | 11-days | $\log_2$ of ratio 11-days / 5-days | p-value  |
|------------------------------------------|------------|---------------------------------------------------------------------------|--------|---------|------------------------------------|----------|
| <b>Substrate generation</b>              |            |                                                                           |        |         |                                    |          |
| nucleotide-sugar interconversion pathway | AT5G39320  | UGD1                                                                      | 11.58  | 10.81   | -0.77                              | 2.19E-03 |
|                                          | AT1G08200  | AXS2                                                                      | 10.71  | 10.61   | -0.10                              | 1.00     |
|                                          | AT5G15490  | UGD3                                                                      | 10.50  | 10.00   | -0.51                              | 1.00     |
| <b>Lignin toolbox</b>                    |            |                                                                           |        |         |                                    |          |
|                                          | AT4G39330  | CAD1(cinnamyl alcohol dehydrogenase)                                      | 11.72  | 10.47   | -1.25                              | 0.00E+00 |
|                                          | AT2G30490  | C4H (CYP73A5) (trans-cinnamate 4-hydroxylase)                             | 11.30  | 10.97   | -0.33                              | 1.00     |
|                                          | AT5G48930  | HCT (hydroxycinnamoyl-CoA:shikimate/quinate hydroxycinnamoyl transferase) | 11.10  | 11.04   | -0.05                              | 1.00     |
|                                          | AT1G76790  | COMT-like8 (caffeic acid O-methyltransferase)                             | 11.08  | 10.35   | -0.73                              | 9.03E-03 |
|                                          | AT5G54160  | COMT (caffeic acid O-methyltransferase)                                   | 10.43  | 9.71    | -0.72                              | 1.61E-02 |
|                                          | AT2G40890  | C3H2 (CYP98A3) (p-coumarate 3-hydroxylase)                                | 10.25  | 9.65    | -0.60                              | 7.46E-01 |
|                                          | AT5G58490  | CCR-like5 (cinnamoyl-CoA reductase)                                       | 10.02  | 9.89    | -0.13                              | 1.00     |
|                                          | AT5G18900  | prolyl-4-hydroxylase                                                      | 10.24  | 10.29   | 0.05                               | 1.00     |
| <b>Synthesis of polysaccharides</b>      |            |                                                                           |        |         |                                    |          |
| glycosyl transferases (GTs)              | AT5G09870  | GT2 (AtCESA5)                                                             | 10.43  | 9.65    | -0.78                              | 1.64E-03 |
|                                          | AT5G05170  | GT2 (AtCESA3)                                                             | 10.40  | 9.88    | -0.52                              | 1.00     |
|                                          | AT4G39350  | GT2 (AtCESA2)                                                             | 10.23  | 9.52    | -0.72                              | 1.78E-02 |
|                                          | AT4G32410  | GT2 (AtCESA1)                                                             | 10.05  | 9.53    | -0.52                              | 1.00     |
|                                          | AT1G77130  | GT8 (Group A)                                                             | 10.11  | 9.79    | -0.32                              | 1.00     |
|                                          | AT4G00300  | GT31 (Group A)                                                            | 10.06  | 9.55    | -0.51                              | 1.00     |
|                                          | AT2G22900  | GT34                                                                      | 10.26  | 9.71    | -0.55                              | 1.00     |
|                                          | AT2G28110  | GT47 (FRA8)                                                               | 11.69  | 11.26   | -0.43                              | 1.00     |

|                                        |           |                                      |       |       |       |          |
|----------------------------------------|-----------|--------------------------------------|-------|-------|-------|----------|
|                                        | AT1G19360 | GT77                                 | 10.37 | 10.07 | -0.29 | 1.00     |
| <b>Vesicle trafficking</b>             |           |                                      |       |       |       |          |
|                                        | AT1G69460 | emp24/gp25L/p24 family protein       | 10.88 | 10.55 | 0.33  | 1.00     |
| <b>Modification of polysaccharides</b> |           |                                      |       |       |       |          |
| glycosyl hydrolases (GHs)              | AT1G64390 | GH9 (endoglucanases)                 | 10.68 | 10.19 | -0.49 | 1.00     |
|                                        | AT4G02290 | GH9 (endoglucanases)                 | 11.10 | 10.08 | -1.02 | 1.57E-07 |
|                                        | AT4G14130 | GH16 (AtXTH15)                       | 13.61 | 12.31 | -1.31 | 0.00E+00 |
|                                        | AT2G06850 | GH16 (AtXTH4)                        | 13.27 | 12.62 | -0.65 | 1.96E-01 |
|                                        | AT4G30290 | GH16 (AtXTH19)                       | 12.37 | 12.15 | -0.22 | 1.00     |
|                                        | AT1G32170 | GH16 (AtXTH30)                       | 11.24 | 11.17 | -0.06 | 1.00     |
|                                        | AT1G11545 | GH16 (At-XTH8)                       | 10.48 | 10.34 | -0.14 | 1.00     |
|                                        | AT2G01850 | GH16 (At-XTH27)                      | 10.42 | 10.34 | -0.08 | 1.00     |
|                                        | AT4G30270 | GH16 (AtXTH24)                       | 9.88  | 10.14 | 0.25  | 1.00     |
|                                        | AT5G42100 | GH17 (Group C)                       | 10.36 | 10.13 | -0.22 | 1.00     |
|                                        | AT3G04010 | GH17 (Group B)                       | 10.25 | 9.24  | -1.01 | 6.09E-08 |
|                                        | AT5G58090 | GH17 (Group B)                       | 9.83  | 10.16 | 0.33  | 1.00     |
|                                        | AT4G23820 | GH28 (Group A)                       | 10.23 | 9.89  | -0.34 | 1.00     |
|                                        | AT5G56870 | GH35 (beta galactosidases) (AtBGAL4) | 13.37 | 12.75 | -0.62 | 4.79E-01 |
|                                        | AT1G45130 | GH35 (beta galactosidases) (AtBGAL5) | 11.77 | 11.16 | -0.61 | 5.91E-01 |
| carbohydrate esterases (CEs)           | AT2G43050 | CE8 (pectin methylesterases)         | 12.72 | 11.24 | -1.48 | 0.00E+00 |
|                                        | AT3G49220 | CE8 (pectin methylesterases)         | 11.84 | 11.15 | -0.69 | 3.94E-02 |
|                                        | AT3G14310 | CE8 (pectin methylesterases) AtPME3  | 11.66 | 10.82 | -0.84 | 1.44E-04 |
|                                        | AT3G05910 | CE13 (pectin acylesterases)          | 10.55 | 10.41 | -0.15 | 1.00     |
| carbohydrate lyases (CLs)              | AT5G48900 | PL1 (pectate lyases) (Group A)       | 11.58 | 10.93 | -0.65 | 1.52E-01 |
|                                        | AT3G07010 | PL1 (pectate lyases) (Group A)       | 11.30 | 10.91 | -0.39 | 1.00E+00 |
|                                        | AT1G04680 | PL1 (pectate lyases) (Group A)       | 11.30 | 10.97 | -0.33 | 1.00     |
|                                        | AT1G67750 | PL1 (pectate lyases) (Group A)       | 10.86 | 10.36 | 0.67  | 1.00     |
|                                        | AT4G24780 | PL1 (pectate lyases) (Group A)       | 9.69  | 10.36 | 0.67  | 9.00E-02 |
| expansins                              | AT5G02260 | AtEXPA9 (alpha expansin)             | 12.95 | 12.54 | -0.41 | 1.00     |
|                                        | AT1G69530 | AtEXPA1 (alpha expansin)             | 11.10 | 11.63 | 0.52  | 1.00     |
|                                        | AT2G40610 | AtEXPA8 (alpha expansin)             | 10.49 | 10.40 | -0.09 | 1.00     |
|                                        | AT4G28250 | AtEXPB3 (beta expansin)              | 10.01 | 10.66 | 0.65  | 1.97E-01 |

|                                                |           |                        |       |       |       |          |
|------------------------------------------------|-----------|------------------------|-------|-------|-------|----------|
| <b>Structural proteins</b>                     |           |                        |       |       |       |          |
| Hyp/Pro rich proteins (H/PRP)                  | AT2G21140 | AtPRP2                 | 12.47 | 11.84 | -0.63 | 3.56E-01 |
|                                                | AT4G38770 | AtPRP4                 | 10.00 | 9.15  | -0.86 | 7.25E-05 |
| LRR-extensins                                  | AT3G24480 | AtLRX4                 | 10.26 | 10.33 | 0.08  | 1.00     |
| <b>Oxido-reductases</b>                        |           |                        |       |       |       |          |
| peroxidases                                    | AT2G37130 | AtPrx21                | 14.91 | 13.66 | -1.25 | 0.00     |
|                                                | AT4G21960 | AtPrx42                | 13.39 | 12.71 | -0.68 | 6.22E-02 |
|                                                | AT3G21770 | AtPrx30                | 10.92 | 10.76 | -0.16 | 1.00     |
|                                                | AT4G33870 | AtPrx48                | 10.38 | 10.23 | -0.60 | 8.07E-01 |
|                                                | AT1G05260 | AtPrx03                | 10.78 | 10.30 | -0.47 | 1.00     |
|                                                | AT5G64120 | AtPrx71                | 10.52 | 10.11 | -0.41 | 1.00     |
|                                                | AT1G71695 | AtPrx12                | 10.44 | 9.48  | -0.96 | 7.29E-07 |
| phytoeyanins                                   | AT4G12880 | AtEN20 (early nodulin) | 11.56 | 11.94 | 0.38  | 1.00     |
|                                                | AT2G32300 | AtUCC1 (uclacyanin)    | 11.32 | 11.29 | -0.03 | 1.00     |
|                                                | AT5G15350 | AtEN22 (early nodulin) | 10.22 | 10.58 | 0.35  | 1.00     |
|                                                | AT1G08500 | AtEN21 (early nodulin) | 9.67  | 10.04 | 0.37  | 1.00     |
| SKU-like proteins (multi-copper oxidases)      | AT1G76160 | SKS5                   | 11.24 | 10.98 | -0.26 | 1.00     |
|                                                | AT1G41830 | SKS6                   | 10.20 | 9.74  | -0.45 | 1.00     |
| <b>Proteins possibly involved in signaling</b> |           |                        |       |       |       |          |
| arabinogalactan proteins (AGPs)                | AT2G14890 | AtAGP9                 | 12.43 | 12.55 | 0.12  | 1.00     |
|                                                | AT5G11740 | AtAGP15 (AG peptide)   | 12.04 | 12.70 | 0.66  | 1.26E-01 |
|                                                | AT1G28290 | AtAGP31                | 11.98 | 11.89 | -0.09 | 1.00     |
|                                                | AT3G13520 | AtAGP12 (AG peptide)   | 11.93 | 12.97 | 1.04  | 1.23E-08 |
|                                                | AT5G10430 | AtAGP4                 | 11.76 | 11.86 | 0.10  | 1.00     |
|                                                | AT5G53250 | AtAGP22 (AG peptide)   | 9.98  | 10.94 | 0.96  | 0.00     |
|                                                | AT3G61640 | AtAGP20 (AG peptide)   | 9.91  | 10.65 | 0.74  | 6.96E-03 |
| fasciclin AGPs (FLAs)                          | AT1G03870 | AtFLA9                 | 13.28 | 13.25 | -0.03 | 1.00     |
|                                                | AT2G45470 | AtFLA8                 | 12.49 | 11.88 | -0.60 | 7.22E-01 |
|                                                | AT4G12730 | AtFLA2                 | 11.76 | 11.55 | -0.21 | 1.00     |
|                                                | AT2G04780 | AtFLA7                 | 10.03 | 9.87  | -0.16 | 1.00     |
| <b>Proteases</b>                               |           |                        |       |       |       |          |
| subtilases                                     | AT3G14067 | AtSBT1.4               | 12.34 | 11.18 | -1.16 | 2.25E-11 |
|                                                | AT2G05920 | AtSBT1.8               | 12.30 | 11.50 | -0.81 | 6.10E-04 |
|                                                | AT5G67360 | AtSBT1.7 (ARA12)       | 12.07 | 10.12 | -0.39 | 1.00     |
|                                                | AT5G59090 | AtSBT4.12              | 11.25 | 10.12 | -1.13 | 1.46E-10 |
|                                                | AT5G51750 | AtSBT1.3               | 11.18 | 9.81  | -1.37 | 0.00E+00 |
|                                                | AT3G14240 | AtSBT1.5               | 10.36 | 10.16 | -0.20 | 1.00     |
| <b>Miscellaneous</b>                           |           |                        |       |       |       |          |
| COBRA-like                                     | AT5G60920 | COB                    | 11.44 | 11.10 | -0.34 | 1.00     |
