# Supplementary material for: Cell wall biogenesis of Arabidopsis thaliana elongating cells: transcriptomics complements proteomics
Source: PubMed Central journal article supplement (PMC2774874; doi:10.1186/1471-2164-10-505), 2009-10-31
Supplement: 1471-2164-10-505-S3.pdf [file 1471-2164-10-505-S3.pdf]

**Additional file 3. Secretory Pathway Genes (SPGs) with moderate or high levels of transcripts in 5- and 11-day-old hypocotyls.** SPGs were annotated using bioinformatic softwares for sub-cellular localization and functional domains as described in Methods. The intensity of the signal is expressed as  $\log_2$  the ratio between the levels of transcripts at 11-days and 5-days as well as the p-value are indicated. CWGs are classified by gene family and level of transcript: low level in blue (between background and 9), moderate level in green (between 9 and 10) and high level in red (higher than 10). Significant Bonferroni p-values are highlighted in green ( $p < 5\%$ ).

Genes encoding proteins predicted to be outside the cell are highlighted in yellow, proteins predicted to be secreted and to have trans-membrane domains are in pink, and proteins predicted to be secreted and to have a GPI anchor are in dark yellow. Genes encoding proteins identified in the proteomic study (Irshad *et al.*, submitted for publication) performed with the same plant material are in bold characters.

| Functional class                                       | Gene family                                                                 | AGI number                     | gene name                                 | CATMA probe  | 5-days | 11-days | $\log_2$ of ratio 11-days / 5-days | p-value  |
|--------------------------------------------------------|-----------------------------------------------------------------------------|--------------------------------|-------------------------------------------|--------------|--------|---------|------------------------------------|----------|
| 1 Proteins acting on carbohydrates                     | glycoside hydrolase family 1 (beta-glucosidase)                             | AT3G60130                      |                                           | CATMA3A53140 | 11.42  | 10.59   | -0.83                              | 2.39E-04 |
|                                                        |                                                                             | AT3G18080                      |                                           | CATMA3A17550 | 10.95  | 10.51   | -0.44                              | 1.00     |
|                                                        |                                                                             | AT5G26000                      |                                           | CATMA5A23655 | 10.15  | 9.39    | -0.76                              | 4.17E-03 |
|                                                        |                                                                             | AT1G02850                      |                                           | CATMA1A01780 | 9.34   | 10.00   | 0.65                               | 1.50E-01 |
|                                                        |                                                                             | AT3G21360                      |                                           | CATMA3A21250 | 9.30   | 10.06   | 0.76                               | 3.60E-03 |
|                                                        |                                                                             | AT2G44450                      |                                           | CATMA2A42880 | 9.27   | 9.09    | -0.18                              | 1.00     |
|                                                        |                                                                             | AT3G60140                      | DIN2 (DARK INDUCIBLE 2)                   | CATMA3A53150 | 8.01   | 10.03   | 2.01                               | 0.00E+00 |
|                                                        |                                                                             | AT1G52400                      |                                           | CATMA1A43455 | 7.77   | 9.15    | 1.37                               | 0.00E+00 |
|                                                        | glycoside hydrolase family 3                                                | AT5G49360                      |                                           | CATMA5A45350 | 13.31  | 13.07   | -0.24                              | 1.00     |
|                                                        |                                                                             | AT5G10560                      |                                           | CATMA5A09290 | 10.86  | 10.36   | -0.49                              | 1.00     |
|                                                        |                                                                             | AT5G20950                      |                                           | CATMA5A19500 | 10.10  | 9.93    | -0.17                              | 1.00     |
|                                                        | glycoside hydrolase family 9                                                | AT1G64390                      |                                           | CATMA1A53700 | 11.38  | 10.66   | -0.72                              | 1.41E-02 |
|                                                        |                                                                             | AT4G02290                      |                                           | CATMA4A02570 | 10.42  | 9.44    | -0.97                              | 4.35E-07 |
|                                                        |                                                                             | AT5G49720                      | AtKOR                                     | CATMA5A45658 | 9.81   | 9.62    | -0.19                              | 1.00     |
|                                                        |                                                                             | AT1G70710                      | AtCEL1                                    | CATMA1A59990 | 9.90   | 9.29    | -0.62                              | 5.15E-01 |
|                                                        |                                                                             | AT4G14130                      | AtXTH15                                   | CATMA4A14375 | 13.61  | 12.31   | -1.31                              | 0.00E+00 |
|                                                        | glycoside hydrolase family 16 (xyloglucan endotransglycosidases/hydrolases) | AT2G06850                      | AtXTH4                                    | CATMA2A05540 | 13.27  | 12.62   | -0.65                              | 1.96E-01 |
|                                                        |                                                                             | AT4G30290                      | AtXTH19                                   | CATMA4A31900 | 12.37  | 12.15   | -0.22                              | 1.00     |
|                                                        |                                                                             | AT1G32170                      | AtXTH30                                   | CATMA1A30510 | 11.24  | 11.17   | -0.06                              | 1.00     |
|                                                        |                                                                             | AT1G11545                      | AtXTH8                                    | CATMA1A10510 | 10.48  | 10.34   | -0.14                              | 1.00     |
|                                                        |                                                                             | AT2G01850                      | AtXTH27                                   | CATMA2A00905 | 10.42  | 10.34   | -0.08                              | 1.00     |
|                                                        |                                                                             | AT3G44990                      | AtXTH31                                   | CATMA3A38015 | 10.10  | 8.76    | -1.35                              | 0.00E+00 |
|                                                        |                                                                             | AT4G30270                      | AtXTH24                                   | CATMA4A31885 | 9.88   | 10.14   | 0.25                               | 1.00     |
|                                                        |                                                                             | AT1G14720                      | AtXTH28                                   | CATMA1A13765 | 9.72   | 9.73    | 0.00                               | 1.00     |
|                                                        |                                                                             | AT5G13870                      | AtXTH5                                    | CATMA5A12105 | 9.02   | 8.63    | -0.39                              | 1.00     |
|                                                        |                                                                             | AT5G42100                      |                                           | CATMA5A37820 | 10.36  | 10.13   | -0.22                              | 1.00     |
|                                                        | glycoside hydrolase family 17                                               | AT3G04010                      |                                           | CATMA3A02980 | 10.25  | 9.24    | -1.01                              | 6.09E-08 |
|                                                        |                                                                             | AT5G58090                      |                                           | CATMA5A53850 | 9.83   | 10.16   | 0.33                               | 1.00     |
|                                                        |                                                                             | AT2G05790                      |                                           | CATMA2A04550 | 9.71   | 9.45    | -0.26                              | 1.00     |
|                                                        |                                                                             | AT5G42720                      |                                           | CATMA5A38510 | 9.45   | 9.08    | -0.37                              | 1.00     |
|                                                        |                                                                             | AT3G07320                      |                                           | CATMA3A06560 | 9.33   | 8.76    | -0.57                              | 1.00     |
|                                                        |                                                                             | AT5G20330                      |                                           | CATMA5A18800 | 9.07   | 9.09    | 0.02                               | 1.00     |
|                                                        |                                                                             | AT1G05850                      | ELP: ECTOPIC DEPOSITION OF LIGNIN IN PITH | CATMA1A04870 | 13.22  | 12.68   | -0.53                              | 1.00     |
|                                                        |                                                                             | AT2G43590                      | glycoside hydrolase family 19             | CATMA2B42010 | 9.61   | 8.31    | -1.30                              | 0.00E+00 |
|                                                        |                                                                             | AT3G55260                      |                                           | CATMA1A46320 | 10.40  | 9.90    | -0.51                              | 1.00     |
|                                                        |                                                                             | AT5G08380                      |                                           | CATMA5A07660 | 9.14   | 9.11    | -0.03                              | 1.00     |
|                                                        | glycoside hydrolase family 27                                               | AT4G23820                      |                                           | CATMA4A25640 | 10.23  | 9.89    | -0.34                              | 1.00     |
|                                                        |                                                                             | AT3G57790                      |                                           | CATMA3A50830 | 9.12   | 8.79    | -0.33                              | 1.00     |
|                                                        | glycoside hydrolase family 28                                               | AT1G68560                      | XYL1 (alpha-xylosidase)                   | CATMA1A57930 | 10.97  | 10.57   | -0.41                              | 1.00     |
|                                                        |                                                                             | AT5G63840                      | RSW3 (RADIAL SWELLING 3)                  | CATMA5A59360 | 9.57   | 9.58    | 0.00                               | 1.00     |
|                                                        | glycoside hydrolase family 31                                               | AT5G63840                      |                                           | CATMA5A59360 | 9.57   | 9.58    | 0.00                               | 1.00     |
|                                                        |                                                                             | AT5G63840                      |                                           | CATMA5A59360 | 9.57   | 9.58    | 0.00                               | 1.00     |
|                                                        |                                                                             | AT5G63840                      |                                           | CATMA5A59360 | 9.57   | 9.58    | 0.00                               | 1.00     |
|                                                        | glycoside hydrolase family 35 (beta-galactosidase)                          | AT5G56870                      | AtBGAL4                                   | CATMA5A52625 | 13.37  | 12.75   | -0.62                              | 4.79E-01 |
|                                                        |                                                                             | AT1G45130                      | AtBGAL5                                   | CATMA1A37985 | 11.77  | 11.16   | -0.61                              | 5.91E-01 |
|                                                        | glycoside hydrolase family 38 (alpha-mannosidase)                           | AT3G26720                      |                                           | CATMA3A26465 | 11.89  | 11.22   | -0.67                              | 8.25E-02 |
|                                                        |                                                                             | AT5G13980                      |                                           | CATMA5A12210 | 10.16  | 9.63    | -0.52                              | 1.00     |
|                                                        | glycoside hydrolase family 47                                               | AT1G27520                      |                                           | CATMA1A25750 | 9.93   | 10.02   | 0.09                               | 1.00     |
|                                                        |                                                                             | AT5G48900                      |                                           | CATMA5A44810 | 11.58  | 10.93   | -0.65                              | 1.52E-01 |
|                                                        | pectate lyase family 1                                                      | AT3G07010                      |                                           | CATMA3A06210 | 11.30  | 10.91   | -0.39                              | 1.00     |
| AT1G04680                                              |                                                                             |                                | CATMA1A03520                              | 11.30        | 10.97  | -0.33   | 1.00                               |          |
| AT1G67750                                              |                                                                             |                                | CATMA1A57110                              | 10.89        | 10.35  | -0.54   | 1.00                               |          |
| AT4G24780                                              |                                                                             |                                | CATMA4A26470                              | 9.69         | 10.36  | 0.67    | 9.00E-02                           |          |
| AT2G43050                                              |                                                                             |                                | CATMA2A41450                              | 12.72        | 11.24  | -1.48   | 0.00E+00                           |          |
| carbohydrate esterase family 8 (pectin methylsterases) | AT3G49220                                                                   |                                | CATMA3A42250                              | 11.84        | 11.15  | -0.69   | 3.94E-02                           |          |
|                                                        | AT3G14310                                                                   | AtPME3                         | CATMA3A13580                              | 11.66        | 10.82  | -0.84   | 1.44E-04                           |          |
|                                                        | AT1G53840                                                                   |                                | CATMA1A44933                              | 9.72         | 9.75   | 0.03    | 1.00                               |          |
|                                                        | AT3G05910                                                                   |                                | CATMA3A04940                              | 10.55        | 10.41  | -0.15   | 1.00                               |          |
| carbohydrate esterase family 13 (pectin acylesterases) | AT4G19410                                                                   |                                | CATMA4A20590                              | 9.23         | 8.97   | -0.26   | 1.00                               |          |
|                                                        | AT5G57655                                                                   | homologous to xylose isomerase | CATMA5A53360                              | 11.09        | 11.09  | 0.00    | 1.00                               |          |
| glycosyl transferase family 2 (cellulose synthases)    | AT5G09870                                                                   | AtCESA5                        | CATMA5A08637                              | 10.43        | 9.65   | -0.78   | 1.64E-03                           |          |
|                                                        | AT5G05170                                                                   | AtCESA3                        | CATMA5A04375                              | 10.40        | 9.88   | -0.52   | 1.00                               |          |
|                                                        | AT4G39350                                                                   | AtCESA2                        | CATMA4A40743                              | 10.23        | 9.52   | -0.72   | 1.78E-02                           |          |
|                                                        | AT4G32410                                                                   | AtCESA1                        | CATMA4A34150                              | 10.05        | 9.53   | -0.52   | 1.00                               |          |
|                                                        | AT1G05570                                                                   | AtCAL5                         | CATMA1A04500                              | 9.77         | 9.06   | -0.72   | 1.84E-02                           |          |
| glycosyl transferase family 48 (callose synthases)     | AT2G31960                                                                   | AtGSL3                         | CATMA2A30240                              | 9.51         | 9.25   | -0.26   | 1.00                               |          |
|                                                        | AT5G02260                                                                   | AtEXPA9                        | CATMA5A01340                              | 12.95        | 12.54  | -0.41   | 1.00                               |          |
| expansins                                              | AT1G69530                                                                   | AtEXPA1                        | CATMA1A58850                              | 11.10        | 11.63  | 0.52    | 1.00                               |          |
|                                                        | AT2G40610                                                                   | AtEXPA8                        | CATMA2A38930                              | 10.49        | 10.40  | -0.09   | 1.00                               |          |
|                                                        | AT2G28950                                                                   | AtEXPA6                        | CATMA2B27340                              | 9.73         | 9.81   | 0.08    | 1.00                               |          |
|                                                        | AT1G20190                                                                   | AtEXPA11                       | CATMA1A19190                              | 9.56         | 9.31   | -0.24   | 1.00                               |          |
|                                                        | AT4G28250                                                                   | AtEXPB3                        | CATMA4A29890                              | 10.01        | 10.66  | 0.65    | 1.97E-01                           |          |
|                                                        | AT5G02260                                                                   |                                | CATMA5A01340                              | 12.95        | 12.54  | -0.41   | 1.00                               |          |
| 1 Proteases                                            | cysteine proteases (papain family)                                          | AT5G60360                      |                                           | CATMA5A56105 | 12.85  | 12.44   | -0.41                              | 1.00     |
|                                                        |                                                                             | AT4G01610                      |                                           | CATMA4A01830 | 12.70  | 12.50   | -0.20                              | 1.00     |
|                                                        |                                                                             | AT5G43060                      |                                           | CATMA5A38880 | 12.17  | 11.53   | -0.65                              | 0.19     |
|                                                        |                                                                             | AT1G62290                      |                                           | CATMA1A51380 | 11.63  | 11.23   | -0.41                              | 1.00     |
|                                                        |                                                                             | AT4G16190                      |                                           | CATMA4A16980 | 9.96   | 9.94    | -0.02                              | 1.00     |
|                                                        |                                                                             | AT1G20850                      | XCP2 (XYLEM CYSTEINE PEPTIDASE 2)         | CATMA1A19916 | 9.64   | 9.12    | -0.52                              | 1.00     |
|                                                        |                                                                             | AT4G36880                      |                                           | CATMA4A38470 | 9.40   | 8.26    | -1.14                              | 6.74E-11 |
|                                                        |                                                                             | AT3G43960                      |                                           | CATMA3A36840 | 9.18   | 8.40    | -0.78                              | 1.71E-03 |
|                                                        | serine proteases (proteins homologous to serine proteases)                  | AT3G14067                      | AtSBT1.4                                  | CATMA3A13290 | 12.34  | 11.18   | -1.16                              | 2.25E-11 |
|                                                        |                                                                             | AT2G05920                      | AtSBT1.8                                  | CATMA2A04690 | 12.30  | 11.50   | -0.81                              | 6.10E-04 |
|                                                        |                                                                             | AT5G67360                      | AtSBT1.7, ARA12                           | CATMA5A62810 | 12.07  | 11.68   | -0.39                              | 1.00     |
|                                                        |                                                                             | AT5G59090                      | AtSBT4.12                                 | CATMA5A54840 | 11.25  | 10.12   | -1.13                              | 1.46E-10 |
|                                                        |                                                                             | AT5G51750                      | AtSBT1.3                                  | CATMA5A47680 | 11.18  | 9.81    | -1.37                              | 0.00     |
|                                                        |                                                                             | AT3G14240                      | AtSBT1.5                                  | CATMA3A13520 | 10.36  | 10.16   | -0.20                              | 1.00     |
|                                                        |                                                                             | AT1G20160                      | AtSBT5.2                                  | CATMA1A19170 | 9.60   | 9.43    | -0.17                              | 1.00     |
|                                                        |                                                                             | At2G00230                      | AtSBT4.14                                 | CATMA4A00245 | 9.06   | 9.08    | 0.01                               | 1.00     |
|                                                        |                                                                             | AT4G36190                      | serine carboxypeptidase S28               | CATMA4A37850 | 9.81   | 9.49    | -0.32                              | 1.00     |

|    |                                                |                                                |                  |                                                                    |              |       |       |       |          |
|----|------------------------------------------------|------------------------------------------------|------------------|--------------------------------------------------------------------|--------------|-------|-------|-------|----------|
| 18 |                                                | aspartyl proteases                             | AT1G11910        |                                                                    | CATMA1A10930 | 13.37 | 13.00 | -0.37 | 1.00     |
| 19 |                                                |                                                | AT1G66180        |                                                                    | CATMA1A55440 | 11.80 | 11.06 | -0.74 | 7.96E-03 |
| 20 |                                                |                                                | <b>AT5G10770</b> |                                                                    | CATMA5A09510 | 11.73 | 9.55  | -2.17 | 0.00E+00 |
| 21 |                                                |                                                | AT3G54400        |                                                                    | CATMA3A47330 | 10.30 | 9.85  | -0.45 | 1.00     |
| 22 |                                                |                                                | AT5G19120        |                                                                    | CATMA5A17530 | 10.12 | 10.03 | -0.09 | 1.00     |
| 23 |                                                |                                                | AT3G61820        |                                                                    | CATMA5A57420 | 10.10 | 10.19 | 0.09  | 1.00     |
| 24 |                                                |                                                | AT3G52500        |                                                                    | CATMA3A45410 | 9.46  | 8.75  | -0.72 | 1.79E-02 |
| 25 |                                                |                                                | AT3G25700        |                                                                    | CATMA3A25480 | 9.17  | 8.66  | -0.51 | 1.00     |
| 26 |                                                |                                                | AT1G08210        |                                                                    | CATMA1A07200 | 9.11  | 9.39  | 0.29  | 1.00     |
| 27 |                                                |                                                | AT4G16563        |                                                                    | CATMA4A17500 | 9.02  | 8.64  | -0.38 | 1.00     |
| 28 |                                                | peptidases                                     | <b>AT4G32940</b> | <b>asparaginyl peptidase</b>                                       | CATMA4A34690 | 12.75 | 11.82 | -0.93 | 3.04E-06 |
| 29 |                                                |                                                | AT4G38220        | metallopeptidases M20/M25/M40                                      | CATMA4A39730 | 10.76 | 9.95  | -0.80 | 7.27E-04 |
| 30 |                                                |                                                | AT1G78680        | carboxypeptidase                                                   | CATMA1A67745 | 10.58 | 10.09 | -0.49 | 1.00     |
| 31 |                                                |                                                | AT3G10450        | SCPL7 (serine carboxypeptidase)                                    | CATMA3A09450 | 10.43 | 10.26 | -0.17 | 1.00     |
| 32 |                                                |                                                | AT5G56660        | metallopeptidases M20/M25/M40                                      | CATMA5A52456 | 10.27 | 10.17 | -0.11 | 1.00     |
| 33 |                                                |                                                | AT5G08260        | SCPL35 (serine carboxypeptidase)                                   | CATMA5A07520 | 10.10 | 9.46  | -0.64 | 2.66E-01 |
| 34 |                                                |                                                | AT5G19740        | M28 family                                                         | CATMA5A18160 | 9.75  | 9.55  | -0.20 | 1.00     |
| 35 |                                                |                                                | AT3G01720        | metallopeptidase                                                   | CATMA3A00730 | 9.73  | 9.10  | -0.63 | 3.21E-01 |
| 36 |                                                |                                                | AT3G02875        | M20 family                                                         | CATMA3A01800 | 9.12  | 9.09  | -0.03 | 1.00     |
| 37 |                                                |                                                | AT4G01320        | M48 family (AtSTE24)                                               | CATMA4A01520 | 9.02  | 8.86  | -0.15 | 1.00     |
| 1  | <b>Proteins possibly involved in signaling</b> | arabinogalactan proteins (AGPs)                | AT2G14890        | AtAGP9                                                             | CATMA3A12660 | 12.43 | 12.55 | 0.12  | 1.00     |
| 2  |                                                |                                                | AT5G11740        | AtAGP15                                                            | CATMA5A10540 | 12.04 | 12.70 | 0.66  | 1.26E-01 |
| 3  |                                                |                                                | AT3G13520        | AtAGP12                                                            | CATMA3A12660 | 11.93 | 12.97 | 1.04  | 1.23E-08 |
| 4  |                                                |                                                | AT5G10430        | AtAGP4                                                             | CATMA5A09183 | 11.76 | 11.86 | 0.10  | 1.00     |
| 5  |                                                |                                                | AT5G40730        | AtAGP24                                                            | CATMA5A36430 | 11.06 | 11.55 | 0.49  | 1.00     |
| 6  |                                                |                                                | AT5G53250        | AtAGP22                                                            | CATMA5A49170 | 9.98  | 10.94 | 0.96  | 6.83E-07 |
| 7  |                                                |                                                | AT3G61640        | AtAGP20                                                            | CATMA3A54770 | 9.91  | 10.65 | 0.74  | 6.96E-03 |
| 8  |                                                |                                                | AT5G64310        | AtAGP1                                                             | CATMA5A59763 | 9.62  | 9.66  | 0.24  | 1.00     |
| 9  |                                                |                                                | AT2G47930        | AtAGP26                                                            | CATMA2A46360 | 9.07  | 9.62  | 0.55  | 1.00     |
| 10 |                                                | fasciclin-AGPs (FLAs)                          | AT1G03870        | AtFLA9                                                             | CATMA1A02720 | 13.28 | 13.25 | -0.03 | 1.00     |
| 11 |                                                |                                                | AT2G45470        | AtFLA8                                                             | CATMA2A22160 | 12.49 | 11.88 | -0.60 | 7.22E-01 |
| 12 |                                                |                                                | AT4G12730        | AtFLA2                                                             | CATMA4A12870 | 11.76 | 11.55 | -0.21 | 1.00     |
| 13 |                                                |                                                | AT2G04780        | AtFLA7                                                             | CATMA2A03690 | 10.03 | 9.87  | -0.16 | 1.00     |
| 14 |                                                |                                                | AT3G52370        | AtFLA15                                                            | CATMA3A45310 | 9.18  | 8.39  | -0.79 | 1.22E-03 |
| 15 |                                                | GPI-anchored peptides (GAPEPs)                 | AT3G01950        |                                                                    | CATMA3A00940 | 8.42  | 9.00  | 0.58  | 1.00     |
| 16 |                                                | hormones                                       | AT3G49780        | AIPSK3 (PHYTOSULFOKINE 3 PRECURSOR)                                | CATMA3A42820 | 9.00  | 10.13 | 1.13  | 1.01E-10 |
| 17 |                                                | expressed proteins                             | AT2G23810        | tetraspannin domain, signal transduction?                          | CATMA2A22170 | 11.42 | 11.39 | -0.02 | 1.00     |
| 18 |                                                |                                                | AT1G32400        | tetraspannin domain, signal transduction?                          | CATMA1A30780 | 11.22 | 11.17 | -0.05 | 1.00     |
| 19 |                                                | proteins homologous to receptor-kinases (RLKs) | AT2G01820        | LRR IX subfamily                                                   | CATMA2A00870 | 11.76 | 11.28 | -0.48 | 1.00     |
| 20 |                                                |                                                | AT1G09970        | LRR-XI subfamily                                                   | CATMA1A08840 | 11.42 | 11.34 | -0.08 | 1.00     |
| 21 |                                                |                                                | AT1G53730        | AtSRF6 (RLK/Pelle, LRR-V subfamily/STRUBBELIG family)              | CATMA1A44820 | 10.84 | 10.34 | -0.50 | 1.00     |
| 22 |                                                |                                                | AT1G27190        | RLK/Pelle, LRR-Xa subfamily                                        | CATMA1A25440 | 10.73 | 10.70 | -0.04 | 1.00     |
| 23 |                                                |                                                | AT2G37710        | AtLRK1/AtLecRK-e (RLK/Pelle, L-Lectin subfamily)                   | CATMA2A35995 | 10.42 | 10.22 | -0.20 | 1.00     |
| 24 |                                                |                                                | AT1G28440        | HSL1 (HAESA-LIKE 1) (LRR XI subfamily)                             | CATMA1A26640 | 10.20 | 9.56  | -0.65 | 1.74E-01 |
| 25 |                                                |                                                | AT1G69270        | AtRPK1                                                             | CATMA1A58565 | 10.11 | 9.51  | -0.60 | 8.64E-01 |
| 26 |                                                |                                                | AT1G31420        | LRR XIII subfamily                                                 | CATMA1A29670 | 10.09 | 9.65  | -0.45 | 1.00     |
| 27 |                                                |                                                | AT3G49670        | BAM1 (BIG APICAL MERISTEM 1) (LRR VII subfamily)                   | CATMA3A42710 | 10.09 | 9.39  | -0.70 | 3.09E-02 |
| 28 |                                                |                                                | AT1G51940        | LysM subfamily                                                     | CATMA1A43060 | 9.90  | 9.58  | -0.33 | 1.00     |
| 29 |                                                |                                                | AT2G26330        | ERECTA (LRR XIII subfamily)                                        | CATMA2A24675 | 9.90  | 8.99  | -0.90 | 9.91E-06 |
| 30 |                                                |                                                | AT1G48480        | RLK1 (RECEPTOR-LIKE KINASE 1) (LRR III subfamily)                  | CATMA1A39580 | 9.60  | 9.74  | -0.13 | 1.00     |
| 31 |                                                |                                                | AT1G08590        | CLAVATA1 (LRR XI subfamily)                                        | CATMA1A07510 | 9.60  | 8.76  | -0.85 | 1.12E-04 |
| 32 |                                                |                                                | AT4G27300        | SD-1 (S-locus glycoprotein-like domain)                            | CATMA4A28880 | 9.54  | 9.49  | -0.05 | 1.00     |
| 33 |                                                |                                                | AT5G16000        | RLK/Pelle, LRR-II subfamily                                        | CATMA5A14280 | 9.52  | 9.37  | -0.15 | 1.00     |
| 34 |                                                |                                                | AT2G02220        | PSKR1 (PHYTOSULFOKIN RECEPTOR 1) (LRR X subfamily)                 | CATMA2A01270 | 9.40  | 9.06  | -0.34 | 1.00     |
| 35 |                                                |                                                | AT2G39360        | RLK/Pelle, CrRLK1L-1 subfamily                                     | CATMA2A37610 | 9.39  | 8.93  | -0.46 | 1.00     |
| 36 |                                                |                                                | AT5G16590        | LRR III subfamily                                                  | CATMA5A14910 | 9.38  | 8.88  | -0.50 | 1.00     |
| 37 |                                                |                                                | AT3G23150        | ETR2 (ETHYLENE RESPONSE 2)                                         | CATMA3A23140 | 9.35  | 8.72  | -0.63 | 3.14E-01 |
| 38 |                                                |                                                | AT1G07650        | LRR subfamily                                                      | CATMA1A06710 | 9.34  | 9.80  | 0.46  | 1.00     |
| 39 |                                                |                                                | AT2G39180        | AtCRR2                                                             | CATMA2A37410 | 9.27  | 8.78  | -0.50 | 1.00     |
| 40 |                                                |                                                | AT1G70530        | DUF26 subfamily                                                    | CATMA1A59790 | 9.23  | 9.17  | -0.06 | 1.00     |
| 41 |                                                |                                                | AT1G73980        | PEPR1 (PEP1 RECEPTOR 1) (LRR XI subfamily)                         | CATMA1A62310 | 9.11  | 8.83  | -0.28 | 1.00     |
| 42 |                                                |                                                | AT5G48380        | LRR X subfamily                                                    | CATMA5A44340 | 9.04  | 8.86  | -0.18 | 1.00     |
| 43 |                                                |                                                | AT1G51890        | LRR I subfamily                                                    | CATMA1B43000 | 8.89  | 9.10  | 0.22  | 1.00     |
| 44 |                                                |                                                | AT3G24660        | TMKL1 (TRANSMEMBRANE KINASE-LIKE 1) (LRR III receptor-like kinase) | CATMA3A24616 | 8.79  | 9.05  | 0.27  | 1.00     |
| 1  | <b>Structural proteins</b>                     | glycine-rich proteins (GRPs)                   | AT2G05380        | AtGRP3                                                             | CATMA2A04205 | 12.94 | 12.96 | 0.02  | 1.00     |
| 2  |                                                |                                                | AT2G05540        |                                                                    | CATMA2A04310 | 12.45 | 13.37 | 0.92  | 3.93E-06 |
| 3  |                                                |                                                | AT2G05520        |                                                                    | CATMA2A04295 | 12.32 | 12.60 | 0.28  | 1.00     |
| 4  |                                                |                                                | AT4G01985        |                                                                    | CATMA4B02280 | 9.03  | 9.08  | 0.06  | 1.00     |
| 5  |                                                |                                                | AT5G46730        |                                                                    | CATMA5A42740 | 8.75  | 9.22  | 0.47  | 1.00     |
| 6  |                                                |                                                | AT1G62240        |                                                                    | CATMA1A51310 | 8.61  | 9.16  | 0.55  | 1.00     |
| 7  |                                                |                                                | AT5G61160        |                                                                    | CATMA5A57260 | 8.58  | 9.07  | 0.50  | 1.00     |
| 8  |                                                |                                                | AT2G05440        |                                                                    | CATMA2A04270 | 8.30  | 11.40 | 3.10  | 0.00E+00 |
| 9  |                                                | proline-rich proteins (PRPs)                   | AT2G21140        | AtPRP2                                                             | CATMA2A19790 | 12.47 | 11.84 | -0.63 | 3.56E-01 |
| 10 |                                                |                                                | <b>AT1G28290</b> |                                                                    | CATMA1A26460 | 11.98 | 11.89 | -0.09 | 1.00     |
| 11 |                                                |                                                | AT4G38770        | AtPRP4                                                             | CATMA4A40195 | 10.00 | 9.15  | -0.86 | 7.25E-05 |
| 12 |                                                |                                                | AT4G16980        |                                                                    | CATMA4A18000 | 9.07  | 9.41  | 0.34  | 1.00     |
| 13 |                                                |                                                | AT4G09530        |                                                                    | CATMA5A06360 | 8.02  | 9.06  | 1.04  | 1.55E-08 |
| 14 |                                                |                                                | AT4G38080        |                                                                    | CATMA4A39600 | 7.80  | 9.32  | 1.52  | 0.00E+00 |
| 15 |                                                | leucine-rich-repeat extensin (LRX)             | <b>AT3G24480</b> | <b>AtLRX4 (LRX-extensin)</b>                                       | CATMA3A24360 | 10.26 | 10.33 | 0.08  | 1.00     |

|    |                                                               |                                                                              |                                          |                                                                                      |                                        |                                       |              |          |          |       |
|----|---------------------------------------------------------------|------------------------------------------------------------------------------|------------------------------------------|--------------------------------------------------------------------------------------|----------------------------------------|---------------------------------------|--------------|----------|----------|-------|
| 1  | <b>Proteins possibly involved in oxidoreduction reactions</b> | peroxidases                                                                  | AT2G37130                                | AtPrx21                                                                              | CATMA2A35430                           | 14.91                                 | 13.66        | -1.25    | 0.00E+00 |       |
| 2  |                                                               |                                                                              | AT4G21960                                | AtPrx42                                                                              | CATMA4A23655                           | 13.39                                 | 12.71        | -0.68    | 6.22E-02 |       |
| 3  |                                                               |                                                                              | <b>AT3G21770</b>                         | <b>AtPrx30</b>                                                                       | CATMA3B21635                           | 10.92                                 | 10.76        | -0.16    | 1.00     |       |
| 4  |                                                               |                                                                              | AT4G33870                                | AtPrx48                                                                              | CATMA4A35650                           | 10.83                                 | 10.23        | -0.60    | 8.07E-01 |       |
| 5  |                                                               |                                                                              | AT1G05260                                | AtPrx3                                                                               | CATMA1A04113                           | 10.78                                 | 10.30        | -0.47    | 1.00     |       |
| 6  |                                                               |                                                                              | AT5G64120                                | AtPrx71                                                                              | CATMA5A59590                           | 10.52                                 | 10.11        | -0.41    | 1.00     |       |
| 7  |                                                               |                                                                              | <b>AT1G71695</b>                         | <b>AtPrx12</b>                                                                       | CATMA1A60876                           | 10.44                                 | 9.48         | -0.96    | 7.29E-07 |       |
| 8  |                                                               |                                                                              | <b>AT5G66390</b>                         | <b>AtPrx72</b>                                                                       | CATMA5A61725                           | 9.15                                  | 9.38         | 0.23     | 1.00     |       |
| 9  |                                                               |                                                                              | AT2G38390                                | AtPrx23                                                                              | CATMA2A36690                           | 8.71                                  | 9.32         | 0.61     | 6.44E-01 |       |
| 10 |                                                               | proteins homologous to berberine bridge enzymes                              | At5g44380                                |                                                                                      | CATMA5A40150                           | 10.19                                 | 9.03         | -1.16    | 2.81E-11 |       |
| 11 |                                                               | proteins homologous to multicopper oxidases                                  | AT5G21105                                |                                                                                      | CATMA5A19660                           | 11.24                                 | 11.08        | -0.16    | 1.00     |       |
| 12 |                                                               |                                                                              | AT1G76160                                | ATSKS5 (homologous to SKU5)                                                          | CATMA1A65380                           | 11.24                                 | 10.98        | -0.26    | 1.00     |       |
| 13 |                                                               |                                                                              | AT1G41830                                | ATSKS6 (homologous to SKU5)                                                          | CATMA1A35650                           | 10.20                                 | 9.74         | -0.45    | 1.00     |       |
| 14 |                                                               |                                                                              | AT4G12420                                | ATSKU5                                                                               | CATMA4A12530                           | 9.97                                  | 9.70         | -0.27    | 1.00     |       |
| 15 |                                                               |                                                                              | AT4G22010                                | ATSKS4                                                                               | CATMA4A23690                           | 9.04                                  | 8.47         | -0.57    | 1.00     |       |
| 16 |                                                               |                                                                              | AT5G48450                                | ATSKS3                                                                               | CATMA5A44430                           | 9.02                                  | 8.66         | -0.36    | 1.00     |       |
| 17 |                                                               | laccases                                                                     | AT5G60020                                | AtLAC17                                                                              | CATMA5A55770                           | 10.33                                 | 9.64         | -0.69    | 3.97E-02 |       |
| 18 |                                                               |                                                                              | AT5G03260                                | AtLAC11                                                                              | CATMA5A02370                           | 10.29                                 | 10.18        | -0.11    | 1.00     |       |
| 19 |                                                               |                                                                              | AT2G38080                                | AtLAC4 (IRX12) (IRREGULAR XYLEM 12)                                                  | CATMA2A36370                           | 9.52                                  | 8.80         | -0.72    | 1.40E-02 |       |
| 20 |                                                               | expressed protein (oxido-reductase domain)                                   | AT3G03330                                |                                                                                      | CATMA3A02250                           | 10.86                                 | 11.00        | 0.14     | 1.00     |       |
| 21 |                                                               | proteins homologous to copper amine oxidase                                  | AT1G62810                                |                                                                                      | CATMA1A51930                           | 9.05                                  | 9.27         | 0.22     | 1.00     |       |
| 22 |                                                               | phytycyanins (proteins homologous to blue copper binding proteins)           | <b>AT4G12880</b>                         | <b>plastocyanin</b>                                                                  | CATMA4A13020                           | 11.56                                 | 11.94        | 0.38     | 1.00     |       |
| 23 |                                                               |                                                                              | AT2G32300                                | AtUCC1 (uclacyanin)                                                                  | CATMA2A30615                           | 11.32                                 | 11.29        | -0.03    | 1.00     |       |
| 24 |                                                               |                                                                              | AT5G15350                                | AtEN22 (plastocyanin domain)                                                         | CATMA5A13625                           | 10.22                                 | 10.58        | 0.35     | 1.00     |       |
| 25 |                                                               |                                                                              | AT1G08500                                | AtEN21 (plastocyanin domain)                                                         | CATMA1A07465                           | 9.67                                  | 10.04        | 0.37     | 1.00     |       |
| 26 |                                                               |                                                                              | At5G53870                                | AtEN1 (plastocyanin domain)                                                          | CATMA5A49760                           | 9.10                                  | 9.24         | 0.14     | 1.00     |       |
| 27 |                                                               |                                                                              | AT1G72230                                | AtUCC8 (uclacyanin)                                                                  | CATMA1A61460                           | 8.91                                  | 9.34         | 0.43     | 1.00     |       |
| 1  |                                                               |                                                                              | <b>Proteins with interacting domains</b> | proteins homologous to lectins                                                       | <b>AT1G78850</b>                       | <b>curculin-like, mannose binding</b> | CATMA1A67950 | 11.87    | 11.37    | -0.50 |
| 2  |                                                               | <b>AT1G78830</b>                                                             |                                          |                                                                                      | <b>curculin-like, mannose-binding</b>  | CATMA1A67930                          | 10.44        | 9.90     | -0.54    | 1.00  |
| 3  | AT1G78820                                                     | curculin-like, mannose-binding                                               |                                          |                                                                                      | CATMA1A67920                           | 9.66                                  | 8.73         | -0.93    | 3.03E-06 |       |
| 4  | AT3G15356                                                     | legume lectin                                                                |                                          |                                                                                      | CATMA3A14725                           | 11.58                                 | 11.07        | -0.51    | 1.00     |       |
| 5  | <b>AT3G54080</b>                                              | <b>legume lectin</b>                                                         |                                          |                                                                                      | CATMA3A47030                           | 9.98                                  | 9.92         | -0.05    | 1.00     |       |
| 6  | AT1G69295                                                     | expressed protein (X8 domain, carbohydrate binding?)                         |                                          |                                                                                      | CATMA1A58590                           | 11.17                                 | 11.28        | 0.11     | 1.00     |       |
| 7  | AT1G09460                                                     | expressed protein (X8 domain, carbohydrate binding?)                         |                                          |                                                                                      | CATMA1A08310                           | 9.09                                  | 9.60         | 0.51     | 1.00     |       |
| 8  | AT5G61130                                                     | expressed protein (X8 domain, carbohydrate binding?)                         |                                          |                                                                                      | CATMA5A56770                           | 9.04                                  | 8.80         | -0.24    | 1.00     |       |
| 9  | <b>AT2G17120</b>                                              | <b>expressed protein (peptidoglycan-binding LysM domain)</b>                 |                                          |                                                                                      | CATMA2A15860                           | 9.49                                  | 9.27         | -0.22    | 1.00     |       |
| 10 | proteins with leucine-rich repeat (LRR) domains               | <b>AT3G20820</b>                                                             |                                          |                                                                                      | <b>expressed protein (LRR domains)</b> | CATMA3A20560                          | 10.84        | 10.26    | -0.59    | 1.00  |
| 11 |                                                               | <b>AT1G28340</b>                                                             |                                          | <b>expressed protein (LRR domains)</b>                                               | CATMA1A26520                           | 10.25                                 | 9.92         | -0.33    | 1.00     |       |
| 12 |                                                               | <b>AT5G12940</b>                                                             |                                          | <b>expressed protein (LRR domains)</b>                                               | CATMA5A11170                           | 9.94                                  | 9.16         | -0.78    | 1.49E-03 |       |
| 13 |                                                               | AT3G05990                                                                    |                                          | expressed protein (LRR domains)                                                      | CATMA3A05050                           | 9.57                                  | 9.29         | -0.28    | 1.00     |       |
| 14 |                                                               | AT3G19320                                                                    |                                          | expressed protein (LRR domains)                                                      | CATMA3A18956                           | 9.08                                  | 9.06         | -0.01    | 1.00     |       |
| 15 | AT2G33060                                                     | expressed protein (LRR domains)                                              |                                          | CATMA2A31230                                                                         | 9.04                                   | 8.66                                  | -0.38        | 1.00     |          |       |
| 16 | enzyme inhibitors                                             | AT3G12880                                                                    |                                          | pectin methylesterase inhibitor                                                      | CATMA3A11840                           | 9.41                                  | 9.33         | -0.08    | 1.00     |       |
| 17 |                                                               | <b>AT4G25260</b>                                                             |                                          | <b>pectin methylesterase inhibitor</b>                                               | CATMA4A26950                           | 9.37                                  | 9.86         | 0.49     | 1.00     |       |
| 18 |                                                               | <b>AT3G43270</b>                                                             |                                          | <b>pectin methylesterase inhibitor</b>                                               | CATMA3A35650                           | 9.30                                  | 8.89         | -0.41    | 1.00     |       |
| 19 |                                                               |                                                                              |                                          | pectin methylesterase inhibitor                                                      | CATMA5A60045                           | 9.00                                  | 9.07         | 0.07     | 1.00     |       |
| 20 |                                                               | <b>AT5G06860</b>                                                             |                                          | <b>polygalacturonase inhibiting protein (PGIP1)</b>                                  | CATMA5A06073                           | 10.78                                 | 10.47        | -0.30    | 1.00     |       |
| 21 |                                                               | <b>AT1G73260</b>                                                             |                                          | <b>serine protease inhibitor</b>                                                     | CATMA1A62540                           | 12.54                                 | 13.41        | 0.86     | 5.77E-05 |       |
| 22 |                                                               | AT2G31980                                                                    |                                          | protease inhibitor (cystatin)                                                        | CATMA2A30250                           | 10.52                                 | 10.96        | 0.44     | 1.00     |       |
| 23 |                                                               | <b>AT4G16500</b>                                                             |                                          | <b>protease inhibitor (cystatin)</b>                                                 | CATMA4A17360                           | 9.36                                  | 9.60         | 0.24     | 1.00     |       |
| 24 |                                                               | AT5G47550                                                                    |                                          | protease inhibitor (cystatin)                                                        | CATMA5A43530                           | 8.81                                  | 9.18         | 0.37     | 1.00     |       |
| 25 |                                                               | AT1G71950                                                                    |                                          | protease inhibitor                                                                   | CATMA1A61160                           | 9.92                                  | 10.36        | 0.44     | 1.00     |       |
| 26 | AT2G02120                                                     | protease inhibitor (gamma-thionin)                                           |                                          | CATMA2A01180                                                                         | 9.91                                   | 10.89                                 | 0.99         | 2.00E-07 |          |       |
| 27 | AT2G43510                                                     | protease inhibitor (ATT1) (ARABIDOPSIS THALIANA TRYPSIN INHIBITOR PROTEIN 1) |                                          | CATMA2A41920                                                                         | 8.40                                   | 9.16                                  | 0.76         | 3.69E-03 |          |       |
| 28 | <b>AT1G17860</b>                                              | <b>protease inhibitor (Kunitz)</b>                                           |                                          | CATMA1A16880                                                                         | 9.53                                   | 9.73                                  | 0.20         | 1.00     |          |       |
| 29 | AT1G73330                                                     | protease inhibitor (Kunitz)                                                  |                                          | CATMA1A62630                                                                         | 9.22                                   | 9.07                                  | -0.15        | 1.00     |          |       |
| 30 | expressed proteins with diverse structural domains            | AT1G21680                                                                    |                                          | expressed protein (WD40-like Beta Propeller Repeat)                                  | CATMA1A20770                           | 11.45                                 | 12.08        | 0.63     | 3.73E-01 |       |
| 31 |                                                               | <b>AT3G62360</b>                                                             |                                          | <b>expressed protein (carbohydrate-binding-like fold)</b>                            | CATMA3A55500                           | 9.14                                  | 8.80         | -0.34    | 1.00     |       |
| 32 |                                                               | <b>AT3G51050</b>                                                             |                                          | <b>expressed protein (FG-GAP repeat that may fold into beta-propeller structure)</b> | CATMA3A44050                           | 10.28                                 | 10.00        | -0.28    | 1.00     |       |
| 33 |                                                               | <b>AT3G09090</b>                                                             |                                          | <b>expressed protein (FG-GAP domain that may fold into beta-propeller structure)</b> | CATMA3A07960                           | 9.60                                  | 9.59         | -0.02    | 1.00     |       |

|    |                                      |                                                                                                  |               |                                                           |                                                                                                                             |                                                              |              |       |          |          |          |
|----|--------------------------------------|--------------------------------------------------------------------------------------------------|---------------|-----------------------------------------------------------|-----------------------------------------------------------------------------------------------------------------------------|--------------------------------------------------------------|--------------|-------|----------|----------|----------|
| 1  | Proteins related to lipid metabolism | proteins homologous to GDSL Lipase/Acylhydrolase                                                 | AT3G16370     |                                                           | CATMA3A15780                                                                                                                | 12.19                                                        | 11.60        | -0.59 | 1.00     |          |          |
| 2  |                                      |                                                                                                  | AT1G28580     |                                                           | CATMA1A26790                                                                                                                | 11.62                                                        | 11.78        | 0.16  | 1.00     |          |          |
| 3  |                                      |                                                                                                  | AT2G04570     |                                                           | CATMA2A03550                                                                                                                | 10.67                                                        | 9.99         | -0.69 | 4.83E-02 |          |          |
| 4  |                                      |                                                                                                  | AT5G45950     |                                                           | CATMA5A41950                                                                                                                | 10.61                                                        | 9.36         | -1.25 | 0.00E+00 |          |          |
| 5  |                                      |                                                                                                  | AT5G45670     |                                                           | CATMA5A41660                                                                                                                | 10.47                                                        | 10.56        | 0.08  | 1.00     |          |          |
| 6  |                                      |                                                                                                  | AT3G04290     |                                                           | CATMA3A03260                                                                                                                | 10.15                                                        | 9.02         | -1.13 | 1.40E-10 |          |          |
| 7  |                                      |                                                                                                  | AT5G03610     |                                                           | CATMA5A02790                                                                                                                | 9.73                                                         | 9.60         | -0.13 | 1.00     |          |          |
| 8  |                                      |                                                                                                  | AT1G54000     |                                                           | CATMA1A45100                                                                                                                | 9.63                                                         | 8.79         | -0.84 | 1.23E-04 |          |          |
| 9  |                                      |                                                                                                  | AT1G09390     |                                                           | CATMA1A08220                                                                                                                | 9.33                                                         | 9.06         | -0.28 | 1.00     |          |          |
| 10 |                                      |                                                                                                  | AT3G14220     |                                                           | CATMA3A13490                                                                                                                | 9.27                                                         | 8.59         | -0.68 | 6.28E-02 |          |          |
| 11 |                                      |                                                                                                  | AT3G48460     |                                                           | CATMA3A41440                                                                                                                | 9.03                                                         | 8.11         | -0.91 | 6.07E-06 |          |          |
| 12 |                                      | proteins homologous to plant lipid transfer protein/seed storage/trypsin alpha amylase inhibitor | AT2G38540     | LTP1                                                      | CATMA2A36820                                                                                                                | 11.67                                                        | 11.33        | -0.34 | 1.00     |          |          |
| 13 |                                      |                                                                                                  | AT2G45180     |                                                           | CATMA2A43580                                                                                                                | 12.81                                                        | 13.33        | 0.52  | 1.00     |          |          |
| 14 |                                      |                                                                                                  | AT1G12090     |                                                           | CATMA1A11135                                                                                                                | 12.27                                                        | 12.13        | -0.14 | 1.00     |          |          |
| 15 |                                      |                                                                                                  | AT1G27950     |                                                           | CATMA1A26130                                                                                                                | 11.15                                                        | 11.22        | 0.07  | 1.00     |          |          |
| 16 |                                      |                                                                                                  | AT3G18280     |                                                           | CATMA3A17820                                                                                                                | 10.91                                                        | 12.11        | 1.20  | 5.61E-12 |          |          |
| 17 |                                      |                                                                                                  | AT4G22490     |                                                           | CATMA4A24210                                                                                                                | 10.80                                                        | 9.66         | -0.95 | 1.47E-06 |          |          |
| 18 |                                      |                                                                                                  | AT3G43720     |                                                           | CATMA3A36600                                                                                                                | 10.09                                                        | 10.13        | 0.04  | 1.00     |          |          |
| 19 |                                      |                                                                                                  | AT2G15050     |                                                           | CATMA2A13890                                                                                                                | 10.04                                                        | 9.92         | -0.12 | 1.00     |          |          |
| 20 |                                      |                                                                                                  | AT3G53980     |                                                           | CATMA3A46940                                                                                                                | 10.03                                                        | 10.45        | 0.42  | 1.00     |          |          |
| 21 |                                      |                                                                                                  | AT4G15160     |                                                           | CATMA4A15700                                                                                                                | 9.80                                                         | 9.31         | -0.50 | 1.00     |          |          |
| 22 |                                      |                                                                                                  | AT1G55260     |                                                           | CATMA1A46320                                                                                                                | 9.70                                                         | 9.70         | 0.01  | 1.00     |          |          |
| 23 |                                      |                                                                                                  | AT3G22620     |                                                           | CATMA3A22590                                                                                                                | 9.44                                                         | 9.61         | 0.17  | 1.00     |          |          |
| 24 |                                      |                                                                                                  | AT5G05960     |                                                           | CATMA5A05150                                                                                                                | 8.64                                                         | 9.48         | 0.84  | 1.29E-04 |          |          |
| 25 | AT2G13820                            |                                                                                                  | CATMA2A12440  | 8.56                                                      | 9.11                                                                                                                        | 0.55                                                         | 1.00         |       |          |          |          |
| 26 |                                      | expressed protein (ML domain - MD-2-related lipid recognition domain)                            | AT3G44100     |                                                           | CATMA3A36990                                                                                                                | 10.15                                                        | 10.63        | 0.48  | 1.00     |          |          |
| 27 |                                      |                                                                                                  | AT2G16005     |                                                           | CATMA2A14850                                                                                                                | 10.08                                                        | 10.17        | 0.09  | 1.00     |          |          |
| 28 |                                      | others                                                                                           | AT5G18630     | homologous to lipase (class 3)                            | CATMA5A16940                                                                                                                | 9.63                                                         | 9.68         | 0.05  | 1.00     |          |          |
| 29 |                                      |                                                                                                  | AT5G14180     | homologous to lipase                                      | CATMA5A12400                                                                                                                | 8.91                                                         | 10.46        | 1.55  | 0.00E+00 |          |          |
| 30 |                                      |                                                                                                  | AT5G62200     | homologous to lipase/lipoxygenase                         | CATMA5A57790                                                                                                                | 9.56                                                         | 9.22         | 0.34  | 1.00     |          |          |
| 31 |                                      |                                                                                                  | AT3G51730     | homologous to saposin                                     | CATMA3A44690                                                                                                                | 11.12                                                        | 11.45        | 0.33  | 1.00     |          |          |
| 32 |                                      |                                                                                                  | AT5G01800     |                                                           | CATMA5A00860                                                                                                                | 9.41                                                         | 9.42         | 0.02  | 1.00     |          |          |
| 33 |                                      |                                                                                                  | AT4G26690     | homologous to glycerophosphoryl diester phosphodiesterase | CATMA4A28280                                                                                                                | 9.87                                                         | 9.58         | -0.29 | 1.00     |          |          |
| 34 |                                      |                                                                                                  | AT4G29700     | homologous to type I phosphodiesterase                    | CATMA4A31330                                                                                                                | 9.42                                                         | 8.53         | -0.89 | 1.78E-05 |          |          |
| 35 |                                      |                                                                                                  | AT1G76090     | homologous to sterol methyltransferase                    | CATMA1A65315                                                                                                                | 11.94                                                        | 11.93        | -0.01 | 1.00     |          |          |
| 36 |                                      |                                                                                                  | AT1G20330     |                                                           | CATMA1A19326                                                                                                                | 9.39                                                         | 9.11         | -0.29 | 1.00     |          |          |
| 37 |                                      |                                                                                                  | AT5G34850     | homologous to phosphoesterase                             | CATMA5A29650                                                                                                                | 12.30                                                        | 11.94        | -0.36 | 1.00     |          |          |
| 38 |                                      |                                                                                                  | AT1G07230     |                                                           | CATMA1A06280                                                                                                                | 10.08                                                        | 9.71         | -0.36 | 1.00     |          |          |
| 39 |                                      |                                                                                                  | AT4G01950     | homologous to acyltransferase                             | CATMA4A02220                                                                                                                | 9.47                                                         | 8.71         | -0.77 | 2.90E-03 |          |          |
| 40 |                                      |                                                                                                  | AT3G11780     | expressed protein (MD-2-related lipid-recognition domain) | CATMA3A10730                                                                                                                | 10.23                                                        | 10.33        | 0.10  | 1.00E+00 |          |          |
| 1  |                                      |                                                                                                  | Miscellaneous |                                                           | AT3G57010                                                                                                                   | homologous to strictosidine synthase                         | CATMA3A50000 | 10.33 | 9.69     | -0.63    | 2.89E-01 |
| 2  |                                      |                                                                                                  |               |                                                           | AT3G57030                                                                                                                   | homologous to strictosidine synthase                         | CATMA3A50020 | 9.39  | 9.37     | -0.02    | 1.00     |
| 3  |                                      |                                                                                                  |               |                                                           | AT3G45040                                                                                                                   | homologous to cytidyllyltransferase                          | CATMA3A38060 | 9.90  | 9.93     | 0.03     | 1.00     |
| 4  |                                      |                                                                                                  |               |                                                           | AT5G10480                                                                                                                   | PEPINO/PASTICCINO2, putative anti-phosphatase (AtPEP/AtPAS2) | CATMA5A09210 | 9.93  | 9.33     | -0.60    | 8.58E-01 |
| 5  | AT5G60920                            | COBRA                                                                                            |               |                                                           | CATMA5A56600                                                                                                                | 11.44                                                        | 11.10        | -0.34 | 1.00     |          |          |
| 6  | AT1G03880                            | homologous to plant seed storage protein (cupin domain)                                          |               |                                                           | CATMA1A02730                                                                                                                | 9.55                                                         | 9.44         | -0.11 | 1.00     |          |          |
| 7  | AT2G22170                            | homologous to Brassica napus dehydration stress-induced protein                                  |               |                                                           | CATMA2A20720                                                                                                                | 11.49                                                        | 11.29        | -0.20 | 1.00     |          |          |
| 8  | AT3G08650                            | metal transporter family                                                                         |               |                                                           | CATMA3A07470                                                                                                                | 9.95                                                         | 9.57         | -0.38 | 1.00     |          |          |
| 9  | AT5G12200                            | homologous to amido-hydrolase (metal-dependent hydrolase)                                        |               |                                                           | CATMA5A10970                                                                                                                | 11.15                                                        | 10.75        | -0.41 | 1.00     |          |          |
| 10 | AT2G34250                            | homologous to protein transport protein (secE1)                                                  |               |                                                           | CATMA2A32380                                                                                                                | 10.93                                                        | 10.96        | 0.03  | 1.00     |          |          |
| 11 | AT4G29720                            | homologous to flavin containing amine oxidoreductase                                             |               |                                                           | CATMA4A31350                                                                                                                | 9.17                                                         | 9.15         | -0.02 | 1.00     |          |          |
| 12 | AT3G06550                            | homologous to Casp1 O-acetyltransferase                                                          |               |                                                           | CATMA3A05690                                                                                                                | 9.34                                                         | 9.07         | -0.27 | 1.00     |          |          |
| 13 | AT4G35220                            | homologous to cyclase                                                                            |               |                                                           | CATMA4A36950                                                                                                                | 9.58                                                         | 9.36         | -0.22 | 1.00     |          |          |
| 14 |                                      | proteins homologous to late embryogenesis abundant proteins                                      |               |                                                           | AT3G17520                                                                                                                   |                                                              | CATMA3A16945 | 8.53  | 9.32     | 0.79     | 1.10E-03 |
| 15 |                                      |                                                                                                  |               |                                                           | AT2G41260                                                                                                                   | M17                                                          | CATMA2A39610 | 8.99  | 9.69     | 0.70     | 3.02E-02 |
| 16 |                                      | proteins homologous to dirigent proteins                                                         |               |                                                           | AT2G28670                                                                                                                   |                                                              | CATMA2A27080 | 11.91 | 11.37    | -0.55    | 1.00     |
| 17 |                                      |                                                                                                  |               |                                                           | AT4G23690                                                                                                                   |                                                              | CATMA4A25520 | 9.59  | 9.63     | 0.04     | 1.00     |
| 18 |                                      | hormone-related proteins                                                                         |               | AT2G17500                                                 | homologous to auxin efflux carrier protein required for auxin conjugate sensitivity (AtLAR 1) (Zip Zinc transporter domain) | CATMA2B16180                                                 | 10.92        | 10.66 | -0.25    | 1.00     |          |
| 19 |                                      |                                                                                                  |               | AT1G68100                                                 |                                                                                                                             | CATMA1A57475                                                 | 9.72         | 9.64  | -0.09    | 1.00     |          |
| 20 |                                      |                                                                                                  |               | AT5G15230                                                 | gibberellin regulated protein (GASA4)                                                                                       | CATMA5A13515                                                 | 13.16        | 13.93 | 0.77     | 2.75E-03 |          |
| 21 |                                      |                                                                                                  |               | AT2G14900                                                 | gibberellin regulated protein (GASA)                                                                                        | CATMA2A13660                                                 | 10.34        | 11.23 | 0.89     | 1.82E-05 |          |
| 22 |                                      | pathogenesis-related proteins                                                                    |               | AT1G74670                                                 | gibberellin regulated protein (GASA)                                                                                        | CATMA1A64040                                                 | 8.31         | 9.84  | 1.53     | 0.00E+00 |          |
| 23 |                                      |                                                                                                  |               | AT3G04720                                                 | pathogenesis-related protein (AtPR4) (Carbohydrate Binding-Module family 18 - CBM18)                                        | CATMA3A03743                                                 | 10.57        | 10.58 | 0.00     | 1.00     |          |
| 24 |                                      |                                                                                                  |               | AT1G75800                                                 | homologous to thaumatin                                                                                                     | CATMA1A65090                                                 | 10.97        | 10.73 | -0.24    | 1.00     |          |
| 25 | AT5G24620                            | homologous to thaumatin                                                                          |               | CATMA5A22250                                              | 9.62                                                                                                                        | 9.43                                                         | -0.19        | 1.00  |          |          |          |
| 26 | AT4G36010                            | homologous to thaumatin                                                                          |               | CATMA4A37660                                              | 9.21                                                                                                                        | 9.54                                                         | 0.34         | 1.00  |          |          |          |
| 27 | AT1G18520                            | homologous to thaumatin                                                                          |               | CATMA1A17240                                              | 9.20                                                                                                                        | 9.44                                                         | 0.25         | 1.00  |          |          |          |
| 28 |                                      | proteins homologous to germin                                                                    |               | AT5G20630                                                 | AtGER3                                                                                                                      | CATMA5A19130                                                 | 12.46        | 11.16 | -1.30    | 0.00     |          |
| 29 |                                      |                                                                                                  |               | AT1G09560                                                 | GLP5 (subfamily 2, member 1)                                                                                                | CATMA1A08413                                                 | 11.34        | 11.06 | -0.28    | 1.00     |          |
| 30 |                                      |                                                                                                  |               | AT5G03460                                                 | GLP1                                                                                                                        | CATMA5A02640                                                 | 10.72        | 11.43 | 0.71     | 2.07E-02 |          |
| 31 |                                      |                                                                                                  |               | AT3G10080                                                 |                                                                                                                             | CATMA3A08960                                                 | 9.56         | 9.44  | -0.12    | 1.00     |          |
| 32 |                                      | proteins homologous to phosphate-induced proteins (phi)                                          |               | AT5G09440                                                 |                                                                                                                             | CATMA5A08270                                                 | 12.68        | 12.14 | -0.54    | 1.00     |          |
| 33 |                                      |                                                                                                  |               | AT5G51550                                                 |                                                                                                                             | CATMA5A47480                                                 | 9.83         | 10.20 | 0.36     | 1.00     |          |
| 34 |                                      |                                                                                                  |               | AT4G08950                                                 |                                                                                                                             | CATMA4A08890                                                 | 10.87        | 9.93  | -0.94    | 1.69E-06 |          |
| 35 |                                      | proteins homologous to acid phosphatases                                                         |               | AT2G27190                                                 |                                                                                                                             | CATMA2A25560                                                 | 11.34        | 11.09 | -0.25    | 1.00     |          |
| 36 |                                      |                                                                                                  |               | AT5G44020                                                 |                                                                                                                             | CATMA5A39790                                                 | 10.62        | 10.58 | -0.05    | 1.00     |          |
| 37 |                                      |                                                                                                  |               | AT2G01890                                                 | ATPAP8                                                                                                                      | CATMA2A00940                                                 | 10.29        | 10.45 | 0.16     | 1.00     |          |
| 38 |                                      |                                                                                                  |               | AT1G25230                                                 | ATPAP3                                                                                                                      | CATMA1A23880                                                 | 11.05        | 10.37 | -0.67    | 7.49E-02 |          |
| 39 |                                      |                                                                                                  |               | AT1G13900                                                 |                                                                                                                             | CATMA1A12860                                                 | 9.28         | 8.99  | -0.28    | 1.00     |          |
| 40 |                                      |                                                                                                  |               | AT3G20500                                                 |                                                                                                                             | CATMA3A20210                                                 | 9.15         | 9.32  | 0.18     | 1.00     |          |
| 41 |                                      | proteins homologous to ribonucleases                                                             |               | AT1G24450                                                 |                                                                                                                             | CATMA1A23390                                                 | 9.33         | 9.85  | 0.52     | 1.00     |          |
| 42 |                                      |                                                                                                  |               | AT2G39780                                                 | RNS2                                                                                                                        | CATMA2A38006                                                 | 9.73         | 9.88  | 0.15     | 1.00     |          |
| 43 |                                      |                                                                                                  |               | AT1G26820                                                 | RNS3                                                                                                                        | CATMA1A25040                                                 | 8.82         | 9.42  | 0.60     | 8.50E-01 |          |

|    |                  |                                                                                                     |           |           |              |       |       |       |          |
|----|------------------|-----------------------------------------------------------------------------------------------------|-----------|-----------|--------------|-------|-------|-------|----------|
| 1  | Unknown function | expressed proteins                                                                                  | AT5G39570 |           | CATMA5A35150 | 12.21 | 11.93 | -0.27 | 1.00     |
| 2  |                  |                                                                                                     | AT3G13410 |           | CATMA3A12540 | 11.85 | 11.55 | -0.30 | 1.00     |
| 3  |                  |                                                                                                     | AT5G20520 |           | CATMA5A19000 | 11.64 | 12.17 | 0.54  | 1.00     |
| 4  |                  |                                                                                                     | AT3G15950 |           | CATMA3A15360 | 11.44 | 10.99 | -0.45 | 1.00     |
| 5  |                  |                                                                                                     | AT1G78040 |           | CATMA1A67150 | 11.39 | 11.42 | 0.03  | 1.00     |
| 6  |                  |                                                                                                     | AT3G24160 |           | CATMA3A24093 | 11.28 | 11.06 | -0.21 | 1.00     |
| 7  |                  |                                                                                                     | AT5G25265 |           | CATMA5A22980 | 11.02 | 10.80 | -0.22 | 1.00     |
| 8  |                  |                                                                                                     | AT5G52180 |           | CATMA5A48120 | 10.83 | 10.48 | -0.35 | 1.00     |
| 9  |                  |                                                                                                     | AT1G65720 |           | CATMA1A55000 | 10.78 | 11.48 | 0.70  | 2.69E-02 |
| 10 |                  |                                                                                                     | AT5G58375 |           | CATMA5A54130 | 10.66 | 11.41 | 0.75  | 5.56E-03 |
| 11 |                  |                                                                                                     | AT4G39840 |           | CATMA4A41230 | 10.59 | 10.39 | -0.20 | 1.00     |
| 12 |                  |                                                                                                     | AT5G17190 |           | CATMA5A15470 | 10.43 | 10.94 | 0.51  | 1.00     |
| 13 |                  |                                                                                                     | AT2G42840 |           | CATMA2A41257 | 10.42 | 9.80  | -0.63 | 3.54E-01 |
| 14 |                  |                                                                                                     | AT1G61900 |           | CATMA1A50970 | 10.18 | 10.00 | -0.18 | 1.00     |
| 15 |                  |                                                                                                     | AT1G43580 |           | CATMA1A36910 | 10.17 | 10.40 | 0.24  | 1.00     |
| 16 |                  |                                                                                                     | AT2G12400 |           | CATMA2A10420 | 10.15 | 9.64  | -0.50 | 1.00     |
| 17 |                  |                                                                                                     | AT5G61820 |           | CATMA5A57420 | 10.13 | 10.38 | 0.25  | 1.00     |
| 18 |                  |                                                                                                     | AT4G27120 |           | CATMA4A26730 | 10.12 | 10.10 | -0.03 | 1.00     |
| 19 |                  |                                                                                                     | AT5G13140 |           | CATMA5A11350 | 10.09 | 9.61  | -0.48 | 1.00     |
| 20 |                  |                                                                                                     | AT1G69980 |           | CATMA1A59280 | 10.04 | 10.44 | 0.40  | 1.00     |
| 21 |                  |                                                                                                     | AT1G47310 |           | CATMA1A38230 | 10.03 | 9.89  | -0.13 | 1.00     |
| 22 |                  |                                                                                                     | AT1G48440 |           | CATMA1A39540 | 9.88  | 10.25 | 0.36  | 1.00     |
| 23 |                  |                                                                                                     | AT1G61150 |           | CATMA1A50200 | 9.83  | 9.74  | -0.09 | 1.00     |
| 24 |                  |                                                                                                     | AT3G09570 |           | CATMA3A08440 | 9.77  | 9.72  | -0.04 | 1.00     |
| 25 |                  |                                                                                                     | AT3G27390 |           | CATMA3A27250 | 9.76  | 9.20  | -0.57 | 1.00     |
| 26 |                  |                                                                                                     | AT1G67785 |           | CATMA1A57160 | 9.74  | 10.42 | 0.67  | 7.67E-02 |
| 27 |                  |                                                                                                     | AT3G51580 |           | CATMA3A44590 | 9.65  | 9.55  | -0.10 | 1.00     |
| 28 |                  |                                                                                                     | AT5G56170 |           | CATMA5A51950 | 9.63  | 9.94  | 0.30  | 1.00     |
| 29 |                  |                                                                                                     | AT2G04690 |           | CATMA2A03640 | 9.61  | 9.55  | -0.06 | 1.00     |
| 30 |                  |                                                                                                     | AT3G14920 |           | CATMA3A14280 | 9.54  | 9.12  | -0.41 | 1.00     |
| 31 |                  |                                                                                                     | AT4G30450 |           | CATMA4A32060 | 9.48  | 9.94  | 0.46  | 1.00     |
| 32 |                  |                                                                                                     | AT1G29790 |           | CATMA1A27760 | 9.47  | 9.28  | -0.20 | 1.00     |
| 33 |                  |                                                                                                     | AT3G18050 |           | CATMA3A17520 | 9.43  | 9.28  | -0.15 | 1.00     |
| 34 |                  |                                                                                                     | AT5G01075 |           | CATMA5A00100 | 9.34  | 9.58  | 0.25  | 1.00     |
| 35 |                  |                                                                                                     | AT2G12845 |           | CATMA1A11840 | 9.26  | 9.21  | -0.05 | 1.00     |
| 36 |                  |                                                                                                     | AT4G16515 |           | CATMA4A17380 | 9.20  | 9.76  | 0.55  | 1.00     |
| 37 |                  |                                                                                                     | AT1G77350 |           | CATMA1A66570 | 9.17  | 9.54  | 0.37  | 1.00     |
| 38 |                  |                                                                                                     | AT2G42390 |           | CATMA2A40790 | 9.16  | 9.51  | 0.35  | 1.00     |
| 39 |                  |                                                                                                     | AT1G28400 |           | CATMA1A26600 | 9.16  | 9.30  | 0.15  | 1.00     |
| 40 |                  |                                                                                                     | AT1G80860 |           | CATMA1A70080 | 9.06  | 9.42  | 0.36  | 1.00     |
| 41 |                  |                                                                                                     | AT3G62580 |           | CATMA3A55750 | 9.07  | 8.85  | -0.22 | 1.00     |
| 42 |                  |                                                                                                     | AT5G38980 |           | CATMA5A34590 | 9.07  | 9.10  | 0.03  | 1.00     |
| 43 |                  |                                                                                                     | AT5G58640 |           | CATMA5A54390 | 9.02  | 9.26  | 0.24  | 1.00     |
| 44 |                  |                                                                                                     | AT2G35850 |           | CATMA2B34030 | 8.98  | 9.30  | 0.32  | 1.00     |
| 45 |                  |                                                                                                     | AT2G27385 |           | CATMA2A25790 | 8.97  | 9.44  | 0.47  | 1.00     |
| 46 |                  |                                                                                                     | AT3G52360 |           | CATMA3A45300 | 8.96  | 9.06  | 0.10  | 1.00     |
| 47 |                  |                                                                                                     | AT2G31090 |           | CATMA2A29310 | 8.89  | 9.39  | 0.50  | 1.00     |
| 48 |                  |                                                                                                     | AT2G32380 |           | CATMA2A30680 | 8.92  | 9.37  | 0.46  | 1.00     |
| 49 |                  |                                                                                                     | AT1G53650 |           | CATMA5A49530 | 8.74  | 9.74  | 1.00  | 1.07E-07 |
| 50 |                  |                                                                                                     | AT5G14105 |           | CATMA5A12330 | 8.67  | 9.36  | 0.69  | 4.57E-02 |
| 51 |                  |                                                                                                     | AT1G78895 |           | CATMA1A68000 | 8.49  | 9.10  | 0.61  | 6.72E-01 |
| 52 |                  |                                                                                                     | AT5G18850 |           | CATMA5A17220 | 8.38  | 9.27  | 0.89  | 2.02E-05 |
| 53 |                  |                                                                                                     | AT5G40960 |           | CATMA5A36630 | 7.57  | 9.10  | 1.54  | 0.00E+00 |
| 54 |                  | expressed proteins with domains of unknown function (DUF) or uncharacterized protein families (UPF) | AT4G01450 | DUF6      | CATMA4A01650 | 9.76  | 9.43  | -0.34 | 1.00     |
| 55 |                  |                                                                                                     | AT4G28050 | DUF6      | CATMA3A27840 | 9.50  | 9.46  | -0.04 | 1.00     |
| 56 |                  |                                                                                                     | AT1G61740 | DUF81     | CATMA1A50820 | 10.12 | 10.37 | 0.25  | 1.00     |
| 57 |                  |                                                                                                     | AT3G01100 | DUF221    | CATMA3A00135 | 9.90  | 9.85  | -0.05 | 1.00     |
| 58 |                  |                                                                                                     | AT1G30360 | DUF221    | CATMA1A28370 | 11.51 | 10.82 | -0.69 | 4.64E-02 |
| 59 |                  |                                                                                                     | AT2G30900 | DUF231    | CATMA2A29100 | 9.93  | 9.73  | -0.19 | 1.00     |
| 60 |                  |                                                                                                     | AT3G54260 | DUF231    | CATMA3A47210 | 8.58  | 9.75  | 1.17  | 1.12E-11 |
| 61 |                  |                                                                                                     | AT1G51630 | DUF246    | CATMA1A42760 | 10.35 | 9.79  | -0.56 | 1.00     |
| 62 |                  |                                                                                                     | AT3G23300 | DUF248    | CATMA3A23300 | 10.42 | 10.01 | -0.41 | 1.00     |
| 63 |                  |                                                                                                     | AT3G17430 | DUF250    | CATMA3A16860 | 9.58  | 9.45  | -0.13 | 1.00     |
| 64 |                  |                                                                                                     | AT2G28315 | DUF250    | CATMA2A26710 | 9.10  | 8.77  | -0.33 | 1.00     |
| 65 |                  |                                                                                                     | AT5G26740 | DUF300    | CATMA5A24080 | 10.67 | 10.74 | 0.06  | 1.00     |
| 66 |                  |                                                                                                     | AT5G19590 | DUF538    | CATMA5A18020 | 10.66 | 10.72 | 0.06  | 1.00     |
| 67 |                  |                                                                                                     | AT5G19860 | DUF538    | CATMA5A18290 | 11.13 | 10.86 | -0.27 | 1.00     |
| 68 |                  |                                                                                                     | AT4G02370 | DUF538    | CATMA4A02670 | 11.18 | 11.56 | 0.39  | 1.00     |
| 69 |                  |                                                                                                     | AT3G07460 | DUF538    | CATMA3A06690 | 10.35 | 10.48 | 0.13  | 1.00     |
| 70 |                  |                                                                                                     | AT1G02816 | DUF538    | CATMA1A01750 | 8.87  | 9.00  | 0.14  | 1.00     |
| 71 |                  |                                                                                                     | AT3G25290 | DUF568    | CATMA3A25140 | 9.33  | 9.15  | -0.17 | 1.00     |
| 72 |                  |                                                                                                     | AT2G04850 | DUF568    | CATMA2A03790 | 9.07  | 8.69  | -0.38 | 1.00     |
| 73 |                  |                                                                                                     | AT1G27930 | DUF579    | CATMA1A26110 | 9.91  | 9.97  | 0.06  | 1.00     |
| 74 |                  |                                                                                                     | AT4G25830 | DUF588    | CATMA4A27500 | 9.19  | 8.96  | -0.23 | 1.00     |
| 75 |                  |                                                                                                     | AT1G08800 | DUF593    | CATMA1A07710 | 9.02  | 9.28  | 0.25  | 1.00     |
| 76 |                  |                                                                                                     | AT4G32460 | DUF642    | CATMA4A34200 | 10.87 | 10.10 | -0.77 | 2.20E-03 |
| 77 |                  |                                                                                                     | AT5G25460 | DUF642    | CATMA5A23220 | 9.86  | 9.42  | -0.43 | 1.00     |
| 78 |                  |                                                                                                     | AT1G29980 | DUF642    | CATMA1A28000 | 10.14 | 9.74  | -0.40 | 1.00     |
| 79 |                  |                                                                                                     | AT3G08030 | DUF642    | CATMA3A07290 | 12.40 | 12.06 | -0.35 | 1.00     |
| 80 |                  |                                                                                                     | AT5G11420 | DUF642    | CATMA5A10190 | 12.14 | 12.05 | -0.09 | 1.00     |
| 81 |                  |                                                                                                     | AT1G55240 | DUF716    | CATMA1A46290 | 8.98  | 10.06 | 1.08  | 0.00     |
| 82 |                  |                                                                                                     | AT4G04990 | DUF761    | CATMA4A05610 | 9.33  | 9.33  | 0.00  | 1.00     |
| 83 |                  |                                                                                                     | AT4G49310 | DUF791    | CATMA3A42340 | 9.01  | 8.78  | -0.23 | 1.00     |
| 84 |                  |                                                                                                     | AT4G00860 | DUF1138   | CATMA4A00935 | 9.32  | 9.77  | 0.45  | 1.00     |
| 85 |                  |                                                                                                     | AT3G15480 | DUF1218   | CATMA3A14890 | 11.10 | 11.15 | 0.06  | 1.00     |
| 86 |                  |                                                                                                     | AT4G31130 | DUF1218   | CATMA4A32820 | 9.32  | 9.33  | 0.01  | 1.00     |
| 87 |                  |                                                                                                     | AT1G68220 | DUF1218   | CATMA1A57600 | 8.74  | 9.16  | 0.42  | 1.00     |
| 88 |                  |                                                                                                     | AT1G30130 | DUF1365   | CATMA1A28150 | 10.06 | 9.91  | -0.15 | 1.00     |
| 89 |                  |                                                                                                     | AT1G27000 | DUF1664   | CATMA1A25200 | 10.79 | 10.76 | -0.03 | 1.00     |
| 90 |                  |                                                                                                     | AT4G24330 | DUF1682   | CATMA4A26080 | 9.66  | 9.43  | -0.24 | 1.00     |
| 91 |                  |                                                                                                     | AT4G30660 | UPF0057   | CATMA4A32270 | 8.84  | 9.47  | 0.63  | 3.58E-01 |
| 92 |                  |                                                                                                     | AT2G24040 | UPF0057   | CATMA2A22390 | 8.80  | 9.51  | 0.71  | 2.34E-02 |
| 93 |                  |                                                                                                     | AT5G36290 | UPF0016   | CATMA5A31840 | 9.70  | 9.77  | 0.08  | 1.00     |
| 94 |                  |                                                                                                     | AT2G20510 | UPF0136   | CATMA3A20220 | 10.05 | 10.60 | 0.55  | 1.00     |
| 95 |                  |                                                                                                     | AT1G36980 | UPF0220   | CATMA1A34890 | 8.88  | 9.22  | 0.34  | 1.00     |
| 96 |                  | uncharacterized conserved protein                                                                   | AT1G57680 | UCP031277 | CATMA1A47970 | 11.34 | 10.99 | -0.35 | 1.00     |

|     |                                                    |                           |                                                           |              |       |       |          |          |
|-----|----------------------------------------------------|---------------------------|-----------------------------------------------------------|--------------|-------|-------|----------|----------|
| 97  | expressed proteins with diverse structural domains | AT1G07080                 | GILT domain                                               | CATMA1A06150 | 11.44 | 11.49 | 0.05     | 1.00     |
| 98  |                                                    | AT5G25610                 | BURP domain                                               | CATMA5A23380 | 13.08 | 12.33 | -0.76    | 4.22E-03 |
| 99  |                                                    | AT3G20370                 | MATH domain                                               | CATMA3A20050 | 11.42 | 10.92 | -0.50    | 1.00     |
| 100 |                                                    | AT3G22640                 | cupin domain                                              | CATMA3A22600 | 8.53  | 9.00  | 0.47     | 1.00     |
| 101 |                                                    | AT1G71980                 | PA domain (Protease-Associated)                           | CATMA1A61200 | 9.43  | 8.91  | -0.52    | 1.00     |
| 102 |                                                    | AT2G28490                 | cupin domain                                              | CATMA2A26920 | 9.21  | 9.43  | 0.22     | 1.00     |
| 103 |                                                    | AT1G53210                 | calcium-binding EF-hand domains                           | CATMA1A44240 | 11.05 | 10.58 | -0.47    | 1.00     |
| 104 |                                                    | AT1G29020                 | calcium-binding EF-hand domains                           | CATMA1A26980 | 10.36 | 10.09 | -0.27    | 1.00     |
| 105 |                                                    | AT4G27790                 | calcium-binding EF-hand domains                           | CATMA4A29420 | 10.76 | 10.72 | -0.04    | 1.00     |
| 106 |                                                    | AT2G20990                 | calcium dependent membrane targeting domain, CaLB protein | CATMA2A19620 | 10.52 | 10.20 | -0.31    | 1.00     |
| 107 |                                                    | AT1G05500                 | calcium dependent membrane targeting domain, CaLB protein | CATMA1A04400 | 10.25 | 9.82  | -0.43    | 1.00     |
| 108 |                                                    | AT4G04800                 | SeIR domain                                               | CATMA4A05380 | 8.94  | 9.45  | 0.51     | 1.00     |
| 109 |                                                    | AT3G61050                 | calcium dependent membrane targeting domain, CaLB protein | CATMA3A54220 | 10.65 | 10.18 | -0.47    | 1.00     |
| 110 |                                                    | AT1G53590                 | calcium dependent membrane targeting domain, CaLB protein | CATMA1A44600 | 9.22  | 9.00  | -0.22    | 1.00     |
| 111 |                                                    | AT1G21670                 | WD40-like Beta Propeller Repeat                           | CATMA1A20760 | 9.61  | 9.68  | 0.07     | 1.00     |
| 112 |                                                    | AT3G08930                 | integral membrane protein                                 | CATMA3A07760 | 11.29 | 11.00 | -0.28    | 1.00     |
| 113 |                                                    | AT5G18520                 | integral membrane protein                                 | CATMA5A16820 | 11.63 | 11.34 | -0.29    | 1.00     |
| 114 |                                                    | AT5G42090                 | integral membrane protein                                 | CATMA5A37800 | 10.50 | 10.12 | -0.38    | 1.00     |
| 115 |                                                    | AT5G01460                 | integral membrane protein                                 | CATMA5A00520 | 9.72  | 9.59  | -0.13    | 1.00     |
| 116 |                                                    | AT1G61670                 | transmembrane receptor domain                             | CATMA1A50770 | 9.09  | 8.87  | -0.22    | 1.00     |
| 117 |                                                    | AT4G39730                 | membrane or lipid associated protein domain               | CATMA4A41080 | 11.30 | 10.78 | -0.52    | 1.00     |
| 118 | AT2G25110                                          | MIR domain                | CATMA2A23430                                              | 9.35         | 9.78  | 0.43  | 1.00     |          |
| 119 | AT5G40480                                          | invasin/intimin domain    | CATMA5A36140                                              | 9.01         | 9.32  | 0.30  | 1.00     |          |
| 120 | AT5G25100                                          | EMP70 domain              | CATMA5A22810                                              | 9.83         | 9.70  | -0.13 | 1.00     |          |
| 121 | AT1G64670                                          | alpha/beta hydrolase fold | CATMA1A53990                                              | 10.57        | 9.78  | -0.78 | 1.46E-03 |          |
| 122 | other expressed proteins                           | AT4G14420                 | protein associated to hypersensitive response             | CATMA4A14790 | 9.87  | 10.32 | 0.45     | 1.00     |
| 123 |                                                    | AT5G43460                 | protein associated to hypersensitive response             | CATMA5A39320 | 9.74  | 10.56 | 0.83     | 2.63E-04 |
| 124 |                                                    | AT2G41470                 | embryo specific protein                                   | CATMA2A39880 | 10.43 | 10.84 | 0.41     | 1.00     |
| 125 |                                                    | AT2G34700                 | pollen proteins Ole e I family                            | CATMA2A32820 | 11.53 | 9.27  | -2.27    | 0.00E+00 |
